# Supplementary material for: Crystal chemical characteristics of ellestadite-type apatite: implications for toxic metal immobilization
Source: Royal Society of Chemistry journal article supplement (doi:10.1039/c4dt02088j), 2014-01-01
Supplement: c4dt02088j1.pdf [file c4dt02088j1.pdf]

## Supplementary Information

**Table A1.** Output of *SVDdiagnostic* for problematic cases of Rietveld refinements of ellestadite  $\text{Ca}_{10}[(\text{SiO}_4)_x(\text{PO}_4)_{6-2x}(\text{SO}_4)_x]\text{Cl}_2$  for the models in which the Ca(1) and Ca(2) sites were refined simultaneously. (a)  $x = 2.5$ , (b)  $x = 2$ , (c)  $x = 1$ , (d)  $x = 0.5$ , and (e)  $x = 0$ .

**Table A2.** Bond lengths in monoclinic structure ( $P2_1/m$ ) for selected compositions.

**Table A3.** Composition of ellestadite obtained by EPMA.

**Figure A1.** FTIR spectra of  $\text{Ca}_{10}(\text{SiO}_4)_{2.5}(\text{PO}_4)(\text{SO}_4)_{2.5}\text{Cl}_2$  (a) before and (b) after treatment in dilute acid.

**Figure A2.** NPD  $P6_3/m$  Rietveld profiles (a)  $x = 3$ , (b)  $x = 1$  and (c)  $x = 0$ . ( $x$  in  $\text{Ca}_{10}[(\text{SiO}_4)_x(\text{PO}_4)_{6-2x}(\text{SO}_4)_x]\text{Cl}_2$ )

**Table A1****(a).** Output of *SVDdiagnostic* for problematic cases of Rietveld refinements of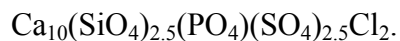

PRECONDITIONED normal matrix

Condition number for matrix of normal equations = 0.642E+02

Error propagation is likely to spoil 2 trailing decimal digits out of probably 14.

Problem well conditioned for double-precision matrix inversion.

Eigenvectors for P1.out ranked according to eigenvalues are printed as columns below

| Eigenvector # | 1 .. | 26          | 27       | 28       | 29       | 30       | 31       | 32       | 33       |          |
|---------------|------|-------------|----------|----------|----------|----------|----------|----------|----------|----------|
| bkg1          | 1    | -0.341 ..   | 0.26     | -0.185   | 0.153    | 0.295    | 0.058    | -0.248   | 0.531    | -0.034   |
| bkg2          | 2    | -0.045 ..   | -0.041   | 0.001    | -0.006   | -0.034   | -0.011   | -0.282   | 0.059    | 0.007    |
| bkg3          | 3    | 0.265 ..    | 0.162    | -0.37    | 0.396    | -0.108   | -0.043   | -0.112   | -0.219   | 0.015    |
| bkg4          | 4    | -0.011 ..   | -0.189   | -0.03    | 0.032    | 0.174    | 0.025    | 0.021    | 0.147    | 0        |
| bkg5          | 5    | 0.011 ..    | 0.176    | -0.235   | 0.213    | -0.04    | -0.029   | -0.146   | -0.074   | 0.004    |
| zeroerror     | 6    | 0.003 ..    | 0.003    | 0.017    | -0.018   | 0.049    | -0.749   | 0.031    | 0.082    | 0.001    |
| peaktype      | 7    | 0.078 ..    | 0.059    | 0.057    | 0.103    | -0.024   | 0.021    | -0.192   | -0.263   | 0.019    |
| Ascale        | 8    | -0.351 ..   | 0.068    | -0.015   | -0.122   | 0.092    | -0.097   | -0.331   | -0.687   | 0.085    |
| Aalta         | 9    | -0.012 ..   | -0.032   | -0.487   | -0.305   | -0.113   | -0.005   | 0.009    | 0.019    | -0.045   |
| Ablda         | 10   | -0.019 ..   | -0.003   | 0.565    | 0.43     | 0.14     | -0.028   | -0.049   | -0.023   | 0.028    |
| Aclda         | 11   | -0.011 ..   | 0.067    | -0.113   | -0.117   | -0.079   | -0.045   | -0.019   | 0.078    | -0.006   |
| peaktyp       | 12   | 0.15 ..     | -0.121   | -0.078   | 0.3      | -0.4     | -0.02    | 0.338    | -0.032   | -0.025   |
| P1scale       | 13   | -0.41 ..    | 0.045    | 0.127    | 0.105    | -0.753   | -0.017   | -0.25    | 0.176    | -0.048   |
| P1atla        | 14   | -0.01 ..    | -0.011   | -0.031   | 0.016    | -0.009   | -0.628   | 0.033    | 0.055    | 0.011    |
| P1ctla        | 15   | 0.015 ..    | 0.007    | 0.043    | -0.032   | 0.064    | -0.15    | -0.009   | 0.019    | -0.001   |
| Ca1z          | 16   | -0.004 ..   | 0.103    | 0.113    | -0.027   | -0.027   | -0.02    | 0.025    | 0.006    | 0        |
| Ca1occ        | 17   | -0.286 ..   | 0.109    | -0.055   | 0.039    | 0.007    | 0.016    | 0.037    | 0.047    | 0.709    |
| Ca2x          | 18   | 0.027 ..    | 0.106    | 0.192    | -0.354   | -0.138   | -0.001   | 0.091    | -0.032   | -0.03    |
| Ca2y          | 19   | 0.013 ..    | 0.197    | 0.202    | -0.349   | -0.149   | 0.005    | 0.1      | -0.012   | -0.034   |
| Ca2occ        | 20   | -0.283 ..   | 0.128    | -0.032   | 0.09     | 0.095    | -0.009   | -0.001   | -0.088   | -0.692   |
| Cabeq         | 21   | 0.372 ..    | 0.734    | 0.068    | -0.068   | 0.002    | -0.004   | -0.119   | 0.051    | 0.024    |
| Px            | 22   | 0.013 ..    | 0.004    | 0.013    | -0.012   | -0.006   | -0.001   | -0.013   | -0.019   | 0        |
| Py            | 23   | 0.005 ..    | -0.031   | 0.013    | 0.045    | 0.019    | -0.004   | 0        | 0.005    | 0.008    |
| Pocc          | 24   | 0.16 ..     | 0.174    | 0.088    | 0.046    | -0.143   | 0.003    | -0.026   | 0.063    | -0.003   |
| O1x           | 25   | -0.045 ..   | 0.025    | 0.095    | -0.031   | 0.06     | 0.015    | 0.006    | 0.001    | -0.006   |
| O1y           | 26   | 0.04 ..     | -0.033   | -0.019   | 0.017    | 0.046    | 0.01     | 0.006    | -0.001   | -0.002   |
| Obeq          | 27   | 0.388 ..    | -0.352   | 0.092    | -0.15    | -0.063   | -0.024   | -0.677   | 0.162    | -0.014   |
| O2x           | 28   | -0.017 ..   | -0.013   | -0.011   | -0.006   | 0.035    | -0.001   | 0.016    | 0.017    | -0.004   |
| O2y           | 29   | -0.008 ..   | -0.044   | -0.131   | -0.007   | -0.005   | 0        | 0.004    | 0.008    | 0.009    |
| O3x           | 30   | 0.018 ..    | 0.068    | 0.086    | 0.046    | 0.012    | -0.02    | 0.023    | -0.003   | 0.015    |
| O3y           | 31   | 0.001 ..    | 0.014    | 0.105    | 0.101    | 0.022    | -0.001   | 0.03     | -0.014   | -0.018   |
| O3z           | 32   | -0.006 ..   | 0.114    | 0.015    | -0.09    | -0.047   | 0        | 0.025    | 0.067    | -0.021   |
| Clz           | 33   | -0.091 ..   | 0.056    | 0.119    | -0.21    | 0.037    | -0.011   | 0.035    | 0.002    | -0.017   |
| Eigenvalues   |      | 4.35E+03 .. | 3.36E-01 | 3.15E+02 | 2.87E-01 | 1.60E-01 | 1.44E-01 | 1.06E-01 | 6.33E-02 | 3.33E-02 |



**Table A1****(b).** Output of *SVDdiagnostic* for problematic cases of Rietveld refinements of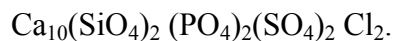

PRECONDITIONED normal matrix

Condition number for matrix of normal equations = 0.136E+03

Error propagation is likely to spoil 2 trailing decimal digits out of probably 14.

Problem well conditioned for double-precision matrix inversion.

Eigenvectors for P2.out ranked according to eigenvalues are printed as columns below

| Eigenvector # | 1 .. | 26          | 27       | 28       | 29       | 30       | 31       | 32       | 33       |          |
|---------------|------|-------------|----------|----------|----------|----------|----------|----------|----------|----------|
| bkg1          | 1    | -0.354 ..   | -0.325   | -0.217   | -0.097   | -0.203   | 0.339    | -0.051   | -0.541   | -0.035   |
| bkg2          | 2    | -0.085 ..   | 0.23     | 0.043    | -0.07    | 0.052    | -0.044   | -0.019   | -0.309   | -0.021   |
| bkg3          | 3    | 0.268 ..    | -0.306   | -0.582   | 0.181    | 0.101    | -0.142   | -0.003   | 0.007    | 0.004    |
| bkg4          | 4    | 0.021 ..    | 0.103    | 0.093    | 0.187    | -0.079   | 0.188    | -0.027   | -0.061   | -0.018   |
| bkg5          | 5    | 0.008 ..    | -0.237   | -0.355   | 0.06     | 0.048    | -0.059   | -0.013   | -0.077   | -0.002   |
| zeroerror     | 6    | 0.001 ..    | 0.014    | 0.025    | 0.041    | -0.158   | -0.156   | -0.705   | 0.016    | -0.013   |
| peaktype      | 7    | 0.047 ..    | 0.029    | -0.09    | -0.188   | 0.491    | 0.035    | -0.136   | 0.061    | -0.008   |
| Ascale        | 8    | -0.258 ..   | 0.06     | -0.102   | -0.24    | 0.653    | 0.063    | -0.207   | 0.123    | -0.013   |
| Aalta         | 9    | 0.008 ..    | 0.081    | -0.035   | 0.031    | 0.054    | 0.02     | 0.022    | 0.007    | 0.005    |
| Ablda         | 10   | -0.004 ..   | -0.01    | 0.039    | -0.044   | -0.055   | 0.007    | -0.011   | -0.003   | 0        |
| Aclta         | 11   | -0.001 ..   | -0.048   | 0.012    | 0.01     | -0.03    | -0.021   | -0.041   | -0.019   | -0.004   |
| peaktyp       | 12   | 0.139 ..    | 0.066    | -0.182   | 0.166    | -0.075   | -0.351   | 0.089    | 0.202    | 0.025    |
| P1scale       | 13   | -0.412 ..   | 0.142    | -0.03    | -0.111   | -0.009   | -0.752   | 0.177    | -0.263   | 0.025    |
| P1atla        | 14   | -0.007 ..   | -0.047   | 0.017    | 0.012    | -0.167   | -0.17    | -0.61    | 0.008    | -0.028   |
| P1ctla        | 15   | 0.011 ..    | 0.068    | 0.016    | 0.063    | -0.029   | 0.008    | -0.117   | -0.004   | 0.001    |
| Ca1z          | 16   | -0.009 ..   | -0.143   | 0.043    | -0.062   | 0        | -0.042   | 0.006    | 0.024    | 0.004    |
| Ca1occ        | 17   | -0.299 ..   | -0.091   | -0.097   | -0.019   | -0.001   | 0.011    | 0.026    | 0.053    | -0.709   |
| Ca2x          | 18   | 0.026 ..    | -0.433   | 0.342    | -0.102   | 0.1      | -0.13    | 0.021    | 0.094    | 0.036    |
| Ca2y          | 19   | 0.02 ..     | -0.477   | 0.311    | -0.17    | 0.039    | -0.137   | 0.039    | 0.092    | 0.039    |
| Ca2occ        | 20   | -0.295 ..   | -0.054   | -0.145   | -0.036   | -0.008   | 0.073    | -0.034   | -0.007   | 0.698    |
| Cabeq         | 21   | 0.014 ..    | 0.041    | 0.002    | -0.028   | 0.035    | -0.016   | 0.001    | 0.002    | 0.003    |
| Px            | 22   | 0.007 ..    | 0.024    | 0.006    | 0.043    | -0.034   | 0.016    | -0.006   | -0.008   | -0.009   |
| Py            | 23   | 0.174 ..    | -0.204   | 0.017    | -0.106   | -0.099   | -0.124   | 0.046    | -0.039   | -0.006   |
| Pocc          | 24   | -0.055 ..   | 0.03     | 0.091    | -0.064   | -0.026   | 0.056    | 0        | 0.004    | 0.005    |
| O1x           | 25   | 0.05 ..     | 0.104    | -0.032   | 0.024    | 0.009    | 0.039    | -0.006   | -0.006   | 0.003    |
| O1y           | 26   | -0.013 ..   | 0.157    | 0.001    | -0.016   | -0.044   | 0.042    | -0.004   | 0.016    | 0        |
| Obeq          | 27   | -0.008 ..   | 0.139    | -0.061   | 0.031    | -0.019   | 0.008    | -0.014   | -0.006   | -0.02    |
| O2x           | 28   | 0.4 ..      | 0.022    | 0.239    | 0.206    | 0.343    | -0.095   | -0.056   | -0.66    | -0.014   |
| O2y           | 29   | 0.018 ..    | 0.131    | -0.023   | -0.069   | -0.03    | -0.001   | -0.024   | 0.018    | -0.016   |
| O3x           | 30   | 0.005 ..    | 0.235    | -0.027   | -0.049   | -0.038   | 0.011    | 0.006    | 0.034    | 0.021    |
| O3y           | 31   | 0.001 ..    | 0.067    | 0.078    | -0.117   | -0.12    | -0.02    | 0.011    | -0.013   | 0.008    |
| O3z           | 32   | -0.1 ..     | -0.019   | 0.233    | -0.149   | -0.059   | 0.034    | -0.02    | 0.024    | 0.018    |
| Clz           | 33   | 0.392 ..    | 0.111    | -0.206   | -0.789   | -0.196   | -0.004   | 0.006    | -0.107   | -0.028   |
| Eigenvalues   |      | 4.36E+03 .. | 3.56E-01 | 2.90E+02 | 2.71E-01 | 2.06E-01 | 1.38E-01 | 1.21E-01 | 7.40E-02 | 3.22E-02 |

**Table A1**

(c). Output of *SVDdiagnostic* for problematic cases of Rietveld refinements of

Ca<sub>10</sub>(SiO<sub>4</sub>)(PO<sub>4</sub>)<sub>4</sub>(SO<sub>4</sub>)Cl<sub>2</sub>.

PRECONDITIONED normal matrix

Condition number for matrix of normal equations = 0.663E+02

Error propagation is likely to spoil 2 trailing decimal digits out of probably 14.

Problem well conditioned for double-precision matrix inversion.

Eigenvectors for P2.out ranked according to eigenvalues are printed as columns below

| Eigenvector # | 1 .. | 26          | 27       | 28     | 29       | 30       | 31       | 32       | 33       |          |          |
|---------------|------|-------------|----------|--------|----------|----------|----------|----------|----------|----------|----------|
| bkg1          | 1    | -0.393 ..   | 0.268    | -0.167 | 0.054    | -0.014   | -0.044   | -0.402   | -0.05    | 0.55     |          |
| bkg2          | 2    | -0.111 ..   | -0.181   | -0.007 | 0.055    | 0.097    | -0.082   | -0.012   | 0.124    | 0.331    |          |
| bkg3          | 3    | 0.267 ..    | 0.361    | -0.438 | -0.256   | 0.147    | -0.071   | 0.188    | 0.176    | 0.071    |          |
| bkg4          | 4    | 0.056 ..    | -0.105   | -0.111 | -0.171   | -0.122   | 0.022    | -0.172   | -0.003   | 0.072    |          |
| bkg5          | 5    | 0.01 ..     | 0.304    | -0.298 | -0.144   | 0.027    | -0.023   | 0.087    | 0.107    | 0.077    |          |
| zeroerror     | 6    | 0.022 ..    | -0.044   | -0.057 | -0.016   | 0.161    | 0.713    | 0.008    | 0.14     | 0.047    |          |
| peaktype      | 7    | 0.065 ..    | 0.049    | 0.013  | 0.114    | 0.091    | -0.122   | 0.175    | 0.352    | -0.074   |          |
| Ascale        | 8    | -0.335 ..   | 0.066    | 0.066  | 0.199    | 0.147    | -0.129   | 0.231    | 0.673    | -0.145   |          |
| Aalta         | 9    | -0.009 ..   | -0.05    | -0.075 | 0.04     | -0.033   | 0.034    | 0.022    | -0.059   | 0.011    |          |
| Abta          | 10   | 0.009 ..    | -0.181   | -0.088 | 0.04     | -0.005   | 0.004    | 0.039    | 0.006    | 0.005    |          |
| Acta          | 11   | -0.008 ..   | 0.219    | 0.079  | -0.066   | 0.075    | 0.026    | -0.018   | -0.044   | 0.047    |          |
| peaktyp       | 12   | 0.12 ..     | -0.068   | -0.218 | -0.261   | 0.028    | 0.008    | 0.274    | -0.208   | -0.192   |          |
| P1scale       | 13   | -0.432 ..   | -0.048   | -0.047 | 0.085    | 0.264    | 0.003    | 0.639    | -0.403   | 0.244    |          |
| P1atla        | 14   | -0.014 ..   | 0.064    | 0.056  | 0.026    | 0.138    | 0.616    | -0.031   | 0.117    | 0.048    |          |
| P1ctla        | 15   | -0.028 ..   | -0.145   | -0.13  | -0.062   | 0.018    | 0.134    | 0.075    | 0.025    | 0.012    |          |
| Ca1z          | 16   | 0 ..        | 0.191    | 0.077  | -0.078   | 0.012    | 0.017    | 0.017    | -0.015   | -0.013   |          |
| Ca2x          | 17   | -0.01 ..    | 0.195    | 0.451  | -0.022   | -0.095   | 0.061    | 0.131    | -0.079   | -0.072   |          |
| Ca2y          | 18   | 0.028 ..    | 0.39     | 0.391  | -0.045   | -0.046   | 0.026    | 0.087    | -0.105   | -0.062   |          |
| Px            | 19   | -0.009 ..   | -0.084   | 0.047  | 0.034    | -0.003   | 0        | 0.027    | 0.027    | -0.009   |          |
| Py            | 20   | 0.015 ..    | -0.035   | -0.016 | -0.034   | 0.006    | -0.005   | -0.022   | 0        | 0.002    |          |
| Pocc          | 21   | 0.247 ..    | 0.186    | 0.003  | 0.111    | 0.081    | 0.021    | 0.107    | -0.149   | 0.038    |          |
| O1x           | 22   | -0.046 ..   | 0.015    | 0.103  | 0.132    | -0.018   | -0.005   | -0.051   | 0.001    | -0.021   |          |
| O1y           | 23   | 0.042 ..    | -0.015   | -0.038 | 0.035    | -0.023   | -0.012   | -0.014   | 0.013    | 0.007    |          |
| Obeq          | 24   | 0.006 ..    | -0.018   | -0.03  | -0.018   | 0.019    | 0.002    | -0.038   | 0.011    | -0.006   |          |
| O2x           | 25   | 0.001 ..    | -0.049   | -0.079 | -0.033   | 0.035    | -0.004   | -0.012   | 0.003    | 0        |          |
| O2y           | 26   | 0.429 ..    | -0.183   | 0.337  | -0.166   | -0.067   | -0.066   | 0.232    | 0.214    | 0.647    |          |
| O3x           | 27   | -0.01 ..    | -0.313   | 0.003  | 0.051    | 0.05     | 0.007    | 0.016    | 0        | -0.018   |          |
| O3y           | 28   | 0.008 ..    | -0.318   | -0.062 | 0.054    | -0.038   | 0.009    | 0.036    | 0.005    | -0.024   |          |
| O3z           | 29   | -0.014 ..   | 0.053    | 0.037  | 0.133    | 0.014    | 0.041    | -0.014   | -0.099   | 0.015    |          |
| Cl1z          | 30   | -0.027 ..   | 0.055    | 0.182  | 0.003    | 0.434    | -0.059   | -0.174   | -0.065   | -0.04    |          |
| Cl1occ        | 31   | -0.166 ..   | 0.101    | -0.116 | 0.175    | -0.652   | 0.119    | 0.167    | 0.063    | 0.019    |          |
| Clbeq         | 32   | 0.397 ..    | 0.094    | -0.175 | 0.767    | 0.154    | -0.027   | -0.016   | -0.118   | 0.064    |          |
| Cl2z          | 33   | 0.059 ..    | 0.086    | -0.044 | 0.16     | -0.368   | 0.124    | 0.181    | -0.015   | 0.072    |          |
| Eigenvalues   |      | 4.18E+03 .. | 3.74E-01 | 0.3    | 0.00E+00 | 2.61E-01 | 1.96E-01 | 1.68E-01 | 1.18E-01 | 1.07E-01 | 6.31E-02 |

**Table A1****(d).** Output of *SVDdiagnostic* for problematic cases of Rietveld refinements of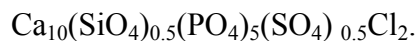

PRECONDITIONED normal matrix

Condition number for matrix of normal equations = 0.564E+02

Error propagation is likely to spoil 2 trailing decimal digits out of probably 14.

Problem well conditioned for double-precision matrix inversion.

Eigenvectors for P2.out ranked according to eigenvalues are printed as columns below

| Eigenvector # | 1 .. | 26          | 27       | 28     | 29       | 30       | 31       | 32       | 33       |          |          |
|---------------|------|-------------|----------|--------|----------|----------|----------|----------|----------|----------|----------|
| bkg1          | 1    | -0.377 ..   | 0.27     | 0.222  | -0.036   | -0.014   | 0.172    | 0.191    | 0.306    | 0.519    |          |
| bkg2          | 2    | -0.132 ..   | -0.229   | -0.043 | -0.025   | -0.049   | -0.075   | 0.011    | 0.07     | 0.353    |          |
| bkg3          | 3    | 0.244 ..    | 0.335    | 0.391  | 0.359    | -0.127   | -0.224   | -0.086   | -0.047   | 0.127    |          |
| bkg4          | 4    | 0.071 ..    | -0.127   | 0.007  | 0.203    | 0.046    | 0.096    | 0.052    | 0.147    | 0.078    |          |
| bkg5          | 5    | 0.011 ..    | 0.276    | 0.28   | 0.23     | -0.021   | -0.11    | -0.063   | 0.007    | 0.09     |          |
| zeroerror     | 6    | 0.009 ..    | -0.029   | 0.034  | 0.009    | -0.319   | 0.399    | -0.555   | 0.003    | 0.043    |          |
| peaktype      | 7    | 0.044 ..    | 0.023    | 0.024  | -0.142   | 0.034    | -0.408   | -0.309   | 0.058    | -0.039   |          |
| Ascale        | 8    | -0.255 ..   | 0.032    | 0.034  | -0.2     | 0.038    | -0.55    | -0.458   | 0.101    | -0.052   |          |
| Aalta         | 9    | 0.004 ..    | 0.016    | 0.005  | 0.002    | 0.009    | 0.06     | -0.008   | -0.015   | -0.017   |          |
| Ab1ta         | 10   | 0.006 ..    | -0.076   | 0.026  | 0.016    | 0.01     | -0.039   | -0.009   | -0.045   | -0.002   |          |
| Ac1ta         | 11   | 0.001 ..    | 0.062    | -0.015 | 0.015    | -0.037   | 0.013    | 0.032    | 0.004    | 0.034    |          |
| peaktyp       | 12   | 0.153 ..    | -0.119   | 0.131  | 0.366    | -0.072   | -0.015   | 0.039    | -0.336   | -0.241   |          |
| P1scale       | 13   | -0.447 ..   | -0.039   | 0.063  | -0.09    | -0.274   | -0.098   | 0.089    | -0.747   | 0.207    |          |
| P1atla        | 14   | 0.005 ..    | 0.097    | -0.065 | -0.033   | -0.235   | 0.34     | -0.439   | 0.036    | 0.041    |          |
| P1ctla        | 15   | -0.029 ..   | -0.161   | 0.094  | 0.087    | -0.09    | 0.151    | -0.163   | -0.076   | 0.015    |          |
| Ca1z          | 16   | -0.006 ..   | 0.139    | -0.035 | 0.052    | -0.005   | 0.02     | -0.011   | -0.015   | -0.011   |          |
| Ca2x          | 17   | -0.03 ..    | 0.335    | -0.415 | -0.079   | 0.076    | 0.067    | -0.027   | -0.16    | -0.068   |          |
| Ca2y          | 18   | 0.046 ..    | 0.493    | -0.366 | -0.058   | 0.057    | 0.027    | 0.019    | -0.112   | -0.071   |          |
| Px            | 19   | -0.021 ..   | -0.091   | -0.037 | -0.027   | 0.004    | -0.027   | -0.034   | -0.011   | 0.003    |          |
| Py            | 20   | 0.024 ..    | -0.072   | 0.008  | 0.057    | -0.009   | 0.007    | 0.016    | 0.021    | -0.001   |          |
| Pocc          | 21   | 0.267 ..    | 0.249    | 0.109  | -0.174   | -0.09    | 0.039    | 0.06     | -0.175   | 0.02     |          |
| O1x           | 22   | -0.053 ..   | -0.026   | -0.038 | -0.147   | 0.031    | 0.026    | 0.023    | 0.028    | -0.02    |          |
| O1y           | 23   | 0.042 ..    | -0.057   | 0.036  | -0.02    | 0.014    | -0.001   | 0.017    | 0.014    | 0.003    |          |
| Obeq          | 24   | 0.003 ..    | -0.043   | -0.001 | 0.042    | -0.002   | -0.003   | -0.007   | 0.037    | -0.004   |          |
| O2x           | 25   | 0.003 ..    | -0.058   | 0.028  | 0.059    | -0.038   | -0.005   | 0.016    | 0.014    | 0        |          |
| O2y           | 26   | 0.439 ..    | -0.136   | -0.394 | 0.097    | 0.055    | -0.173   | -0.105   | -0.132   | 0.661    |          |
| O3x           | 27   | -0.012 ..   | -0.231   | -0.066 | -0.043   | -0.044   | 0.012    | 0.005    | -0.018   | -0.015   |          |
| O3y           | 28   | 0.01 ..     | -0.255   | -0.026 | -0.01    | 0.046    | 0.019    | -0.024   | -0.034   | -0.02    |          |
| O3z           | 29   | -0.001 ..   | 0.028    | 0.011  | -0.126   | 0        | 0.087    | 0.038    | -0.032   | 0        |          |
| Cl1z          | 30   | -0.027 ..   | 0.077    | -0.127 | -0.134   | -0.416   | -0.065   | 0.156    | 0.151    | -0.065   |          |
| Cl1occ        | 31   | -0.196 ..   | 0.034    | 0.145  | -0.015   | 0.633    | 0.188    | -0.19    | -0.154   | 0.045    |          |
| Clbeq         | 32   | 0.398 ..    | -0.036   | 0.383  | -0.664   | -0.04    | 0.059    | 0.089    | -0.085   | 0.061    |          |
| Cl2z          | 33   | 0.121 ..    | 0.039    | 0.109  | -0.06    | 0.357    | 0.149    | -0.133   | -0.193   | 0.085    |          |
| Eigenvalues   |      | 3.95E+03 .. | 3.91E-01 | 0      | 3.29E+02 | 2.88E-01 | 2.30E-01 | 1.97E-01 | 1.58E-01 | 1.27E-01 | 7.01E-02 |

(e). Output of *SVDdiagnostic* for problematic cases of Rietveld refinements of

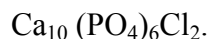

PRECONDITIONED normal matrix

Condition number for matrix of normal equations = 0.374E+02

Error propagation is likely to spoil 2 trailing decimal digits out of probably 14.

Problem well conditioned for double-precision matrix inversion.

Eigenvectors for P2.out ranked according to eigenvalues are printed as columns below

| Eigenvector # | 1 .. | 20          | 21       | 22     | 23       | 24       | 25       | 26       | 27       |          |          |
|---------------|------|-------------|----------|--------|----------|----------|----------|----------|----------|----------|----------|
| bkg1          | 1    | -0.349 ..   | -0.032   | -0.3   | 0.018    | 0.114    | 0.062    | 0.074    | 0.367    | -0.478   |          |
| bkg2          | 2    | -0.161 ..   | -0.029   | 0.081  | 0.033    | 0.004    | -0.073   | 0.036    | 0.052    | -0.335   |          |
| bkg3          | 3    | 0.235 ..    | 0.162    | -0.383 | -0.085   | 0.552    | -0.105   | 0.021    | -0.046   | -0.137   |          |
| bkg4          | 4    | 0.097 ..    | 0.003    | 0.1    | -0.094   | 0.151    | 0.084    | 0.006    | 0.13     | -0.076   |          |
| bkg5          | 5    | -0.002 ..   | 0.1      | -0.307 | -0.047   | 0.344    | -0.012   | 0.007    | 0.003    | -0.105   |          |
| zeroerror     | 6    | -0.008 ..   | -0.234   | 0.013  | 0.1      | 0.091    | -0.052   | -0.737   | 0.043    | -0.039   |          |
| peaktype      | 7    | 0.226 ..    | 0.005    | -0.008 | -0.042   | 0.365    | -0.079   | -0.02    | -0.369   | 0.326    |          |
| P6scale       | 8    | -0.479 ..   | 0.102    | -0.029 | 0.221    | -0.013   | -0.398   | -0.006   | -0.654   | -0.211   |          |
| P6a           | 9    | 0.019 ..    | 0.417    | -0.031 | -0.009   | -0.087   | -0.03    | -0.642   | 0.104    | -0.052   |          |
| P6c           | 10   | -0.014 ..   | -0.722   | 0.053  | 0.085    | 0.198    | -0.023   | -0.131   | -0.08    | 0.003    |          |
| Ca1z          | 11   | 0 ..        | 0.017    | -0.053 | -0.032   | 0.021    | -0.02    | -0.026   | -0.016   | 0.007    |          |
| Ca2x          | 12   | -0.018 ..   | -0.049   | -0.298 | -0.414   | -0.33    | 0.041    | -0.077   | -0.184   | 0.065    |          |
| Ca2y          | 13   | 0.047 ..    | -0.049   | -0.453 | -0.382   | -0.292   | -0.069   | -0.041   | -0.122   | 0.073    |          |
| Cabeq         | 14   | 0.453 ..    | 0.016    | -0.37  | 0.684    | -0.281   | -0.065   | 0.059    | -0.004   | -0.077   |          |
| Px            | 15   | -0.043 ..   | -0.025   | 0.062  | 0.011    | -0.038   | 0.011    | -0.003   | -0.031   | -0.007   |          |
| Py            | 16   | 0.036 ..    | 0.023    | 0.071  | 0.031    | 0.032    | -0.02    | 0.013    | 0.024    | 0.007    |          |
| Pbeq          | 17   | 0.494 ..    | -0.076   | 0.284  | -0.272   | -0.132   | -0.054   | 0.003    | -0.239   | -0.66    |          |
| O1x           | 18   | -0.053 ..   | -0.141   | -0.076 | 0.091    | -0.144   | 0.013    | 0.025    | 0.034    | 0.021    |          |
| O1y           | 19   | 0.032 ..    | -0.041   | -0.104 | 0.085    | -0.017   | 0.035    | 0.024    | -0.024   | -0.011   |          |
| O2x           | 20   | -0.031 ..   | 0.032    | -0.043 | 0.001    | 0.01     | -0.045   | 0.005    | 0.013    | -0.009   |          |
| O2y           | 21   | 0.015 ..    | 0.042    | -0.016 | -0.015   | 0.051    | -0.03    | 0.005    | -0.012   | 0        |          |
| O3x           | 22   | -0.022 ..   | 0.258    | 0.186  | 0.056    | -0.038   | -0.075   | -0.011   | -0.005   | 0.021    |          |
| O3y           | 23   | 0.022 ..    | 0.272    | 0.205  | 0.08     | -0.005   | 0.024    | 0.001    | -0.037   | 0.018    |          |
| O3z           | 24   | 0.017 ..    | -0.098   | -0.079 | 0.081    | -0.124   | 0.009    | -0.027   | -0.006   | 0.013    |          |
| Cl1z          | 25   | -0.035 ..   | -0.119   | -0.08  | -0.052   | -0.134   | -0.486   | 0.02     | 0.204    | 0.067    |          |
| Cl1occ        | 26   | -0.202 ..   | 0.018    | -0.105 | 0.07     | -0.01    | 0.629    | -0.044   | -0.228   | -0.055   |          |
| Cl2z          | 27   | 0.055 ..    | -0.027   | -0.073 | 0.103    | -0.035   | 0.383    | -0.063   | -0.236   | -0.094   |          |
| Eigenvalues   |      | 3.28E+03 .. | 4.17E-01 | 0.4    | 1.00E+01 | 3.42E-01 | 2.94E-01 | 2.67E-01 | 2.02E-01 | 1.67E-01 | 8.76E-02 |

**Table A2.** Bond lengths in monoclinic structure ( $P2_1/m$ ). Note that in all tetrahedra some B-O bond lengths refine to non-physical values. A reasonable spread of B-O distances would be 1.49 – 1.61 Å.

| $x$ | bond lengths (Å) |         |               |         |               |         |
|-----|------------------|---------|---------------|---------|---------------|---------|
| 3   | B(1)-O(1)        | 1.43(3) | B(2)-O(2)     | 1.52(2) | B(3)-O(3)     | 1.49(2) |
|     | B(1)-O(4)        | 1.69(3) | B(2)-O(5)     | 1.81(4) | B(3)-O(6)     | 1.69(3) |
|     | B(1)-O(7) × 2    | 1.63(2) | B(2)-O(8) × 2 | 1.63(2) | B(3)-O(9) × 2 | 1.57(2) |
|     | B(1)-O           | 1.59    | B(2)-O        | 1.64    | B(3)-O        | 1.58    |
| 2.5 | B(1)-O(1)        | 1.22(3) | B(2)-O(2)     | 1.30(2) | B(3)-O(3)     | 1.17(4) |
|     | B(1)-O(4)        | 1.73(2) | B(2)-O(5)     | 1.83(2) | B(3)-O(6)     | 1.88(4) |
|     | B(1)-O(7)        | 1.71(1) | B(2)-O(8) × 2 | 1.62(2) | B(3)-O(9) × 2 | 1.83(3) |
|     | B(1)-O           | 1.59    | B(2)-O        | 1.59    | B(3)-O        | 1.67    |



**Table A3.** Atomic proportions of selected ellestadites obtained by EPMA. A statistically significant deficit of Ca appears for (Si/S) rich ellestadites. Chlorine is underestimated due to volatilization under the electron beam. Chlorine content derived from neutron diffraction (see Table 2) are more reliable.

|           | Ca   | Si   | P    | S    | Cl   | O     |
|-----------|------|------|------|------|------|-------|
| $x = 3$   | 9.88 | 2.96 | 0.02 | 3.06 | 1.65 | 24.27 |
| error     | 0.06 | 0.07 | 0.01 | 0.05 | 0.09 | 0.10  |
| $x = 2.5$ | 9.84 | 2.41 | 1.09 | 2.56 | 1.58 | 24.25 |
| error     | 0.07 | 0.10 | 0.07 | 0.17 | 0.04 | 0.16  |
| $x = 1.0$ | 9.97 | 0.68 | 4.51 | 0.82 | 1.28 | 24.12 |
| error     | 0.09 | 0.04 | 0.14 | 0.06 | 0.04 | 0.08  |
| $x = 0$   | 9.95 |      | 5.94 |      | 1.26 | 24.33 |
| error     | 0.04 |      | 0.03 |      | 0.08 | 0.14  |

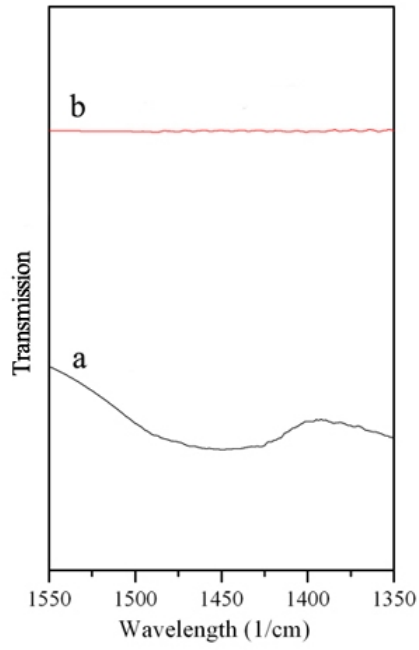

**Fig. A1.** FTIR spectra of  $\text{Ca}_{10}(\text{SiO}_4)_{2.5}(\text{PO}_4)(\text{SO}_4)_{2.5}\text{Cl}_2$  (a) before and (b) after treatment in dilute acid.

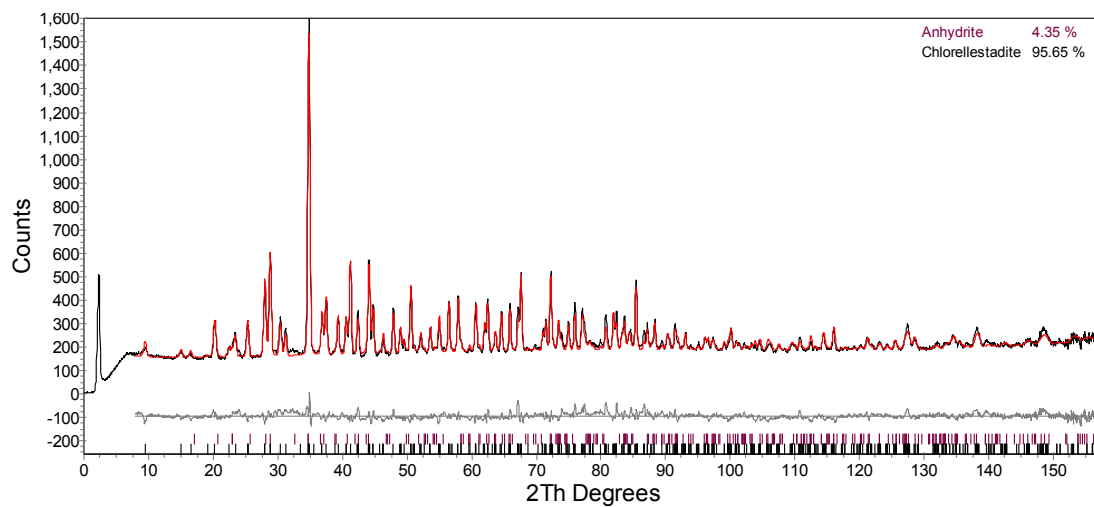

**Fig. A2-(a).** Neutron data and Rietveld refinement of  $\text{Ca}_{10}(\text{SiO}_4)_3(\text{SO}_4)_3\text{Cl}_2$

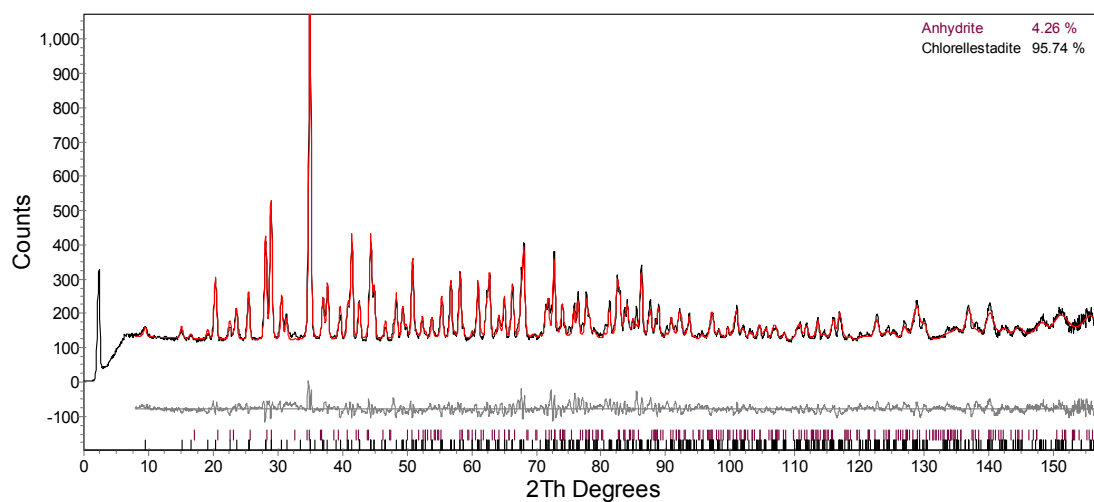

**Fig. A2-(b).** Neutron data and Rietveld refinement of  $\text{Ca}_{10}(\text{SiO}_4)(\text{PO}_4)_4(\text{SO}_4)\text{Cl}_2$

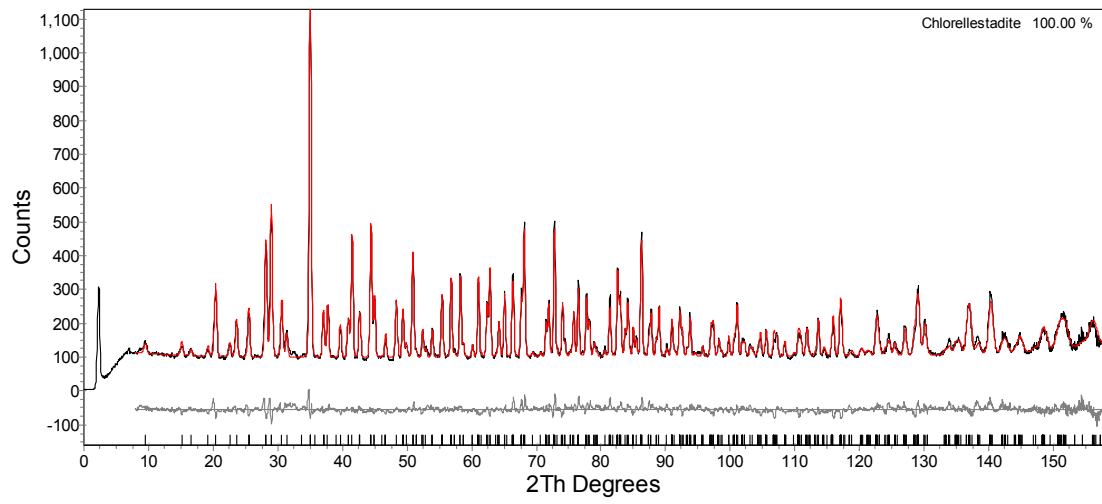

**Fig. A2-(c).** Neutron data and Rietveld refinement of  $\text{Ca}_{10}(\text{PO}_4)_6\text{Cl}_2$
